# Supplementary material
Source: Springer Nature journal article supplement (https://www.springermedizin.de/resource/supplementary/12930_2010_43_MOESM1_ESM.pdf/9424622)

# Flow of Subjects during the Study

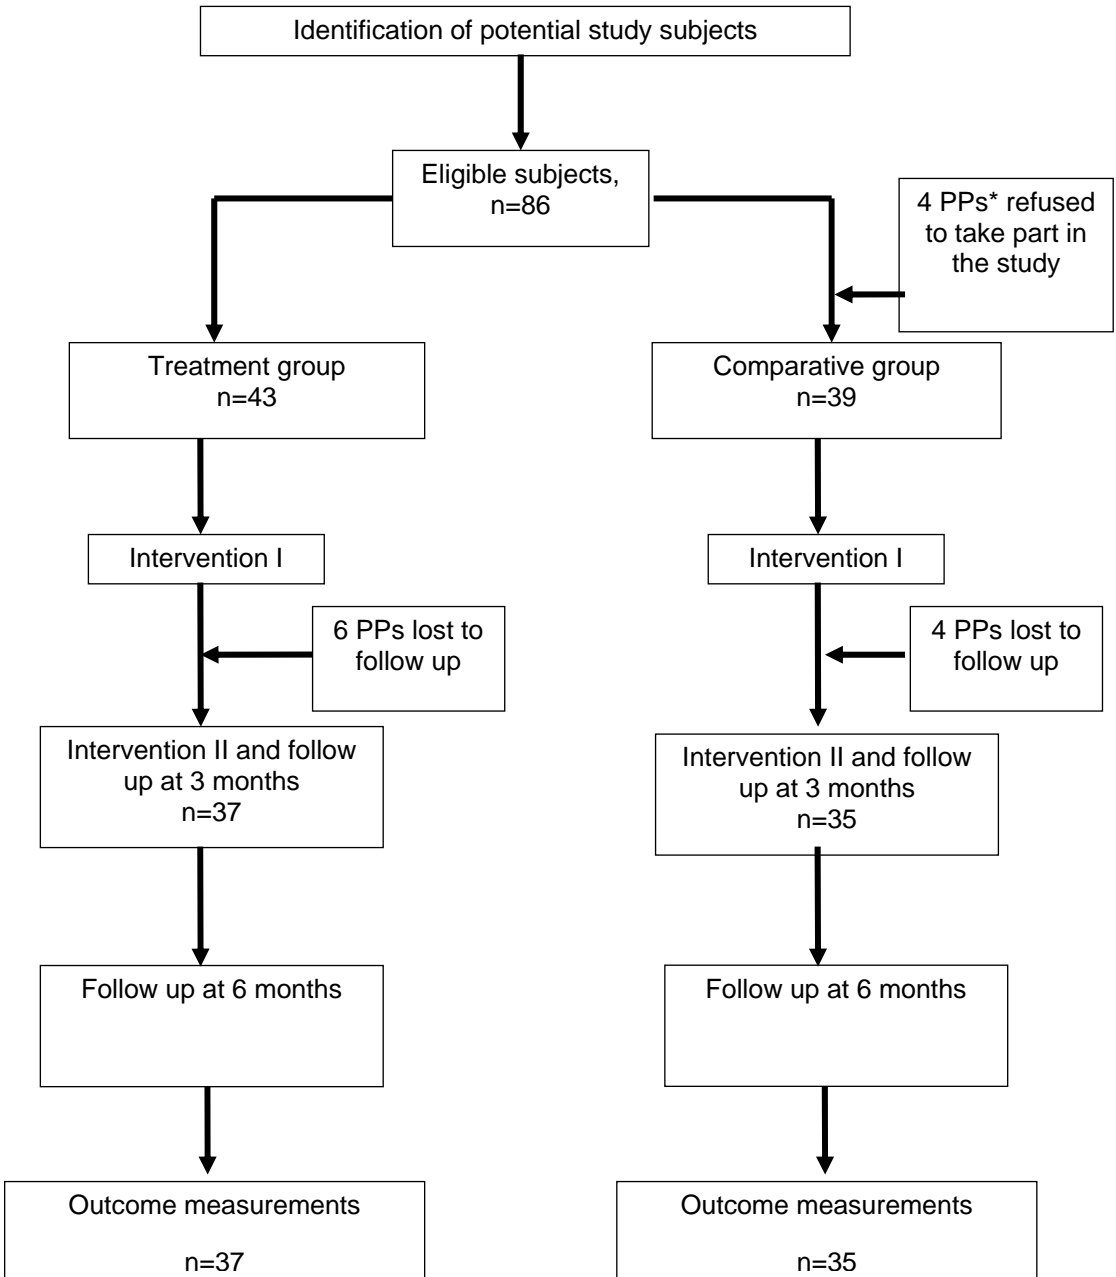

\*PPs= Private General Practitioners

Supplement: MOESM1 [file 9424622]
